# Supplementary material for: Electron-beam-induced phase transition in the transmission electron microscope: the case of VO2(B)
Source: Royal Society of Chemistry journal article supplement (doi:10.1039/c8ce01536h), 2018-01-01
Supplement: c8ce01536h1.pdf [file c8ce01536h1.pdf]

# Electron-Beam-Induced Phase Transition in the Transmission Electron Microscope: The Case of $\text{VO}_2(\text{B})$

*Chun-Wei Huang<sup>a</sup> and Cheng-Lun Hsin<sup>b,\*</sup>*

<sup>a</sup>Industrial Technology Research Institute, Material and Chemical Research  
Laboratories, Hsinchu, 31040, Taiwan

<sup>b</sup>Department of Electrical Engineering, National Central University, Taoyuan 32001,  
Taiwan

\* Correspondence author E-mail: [clhsin@ee.ncu.edu.tw](mailto:clhsin@ee.ncu.edu.tw)

## **Supplementary Information**

### **List of contents.**

**Figure S1 | HRTEM image at the boundary of the  $\text{VO}_2(\text{B})/\text{VO}_2(\text{M1})$  interface of**

**Fig. 3(c).**

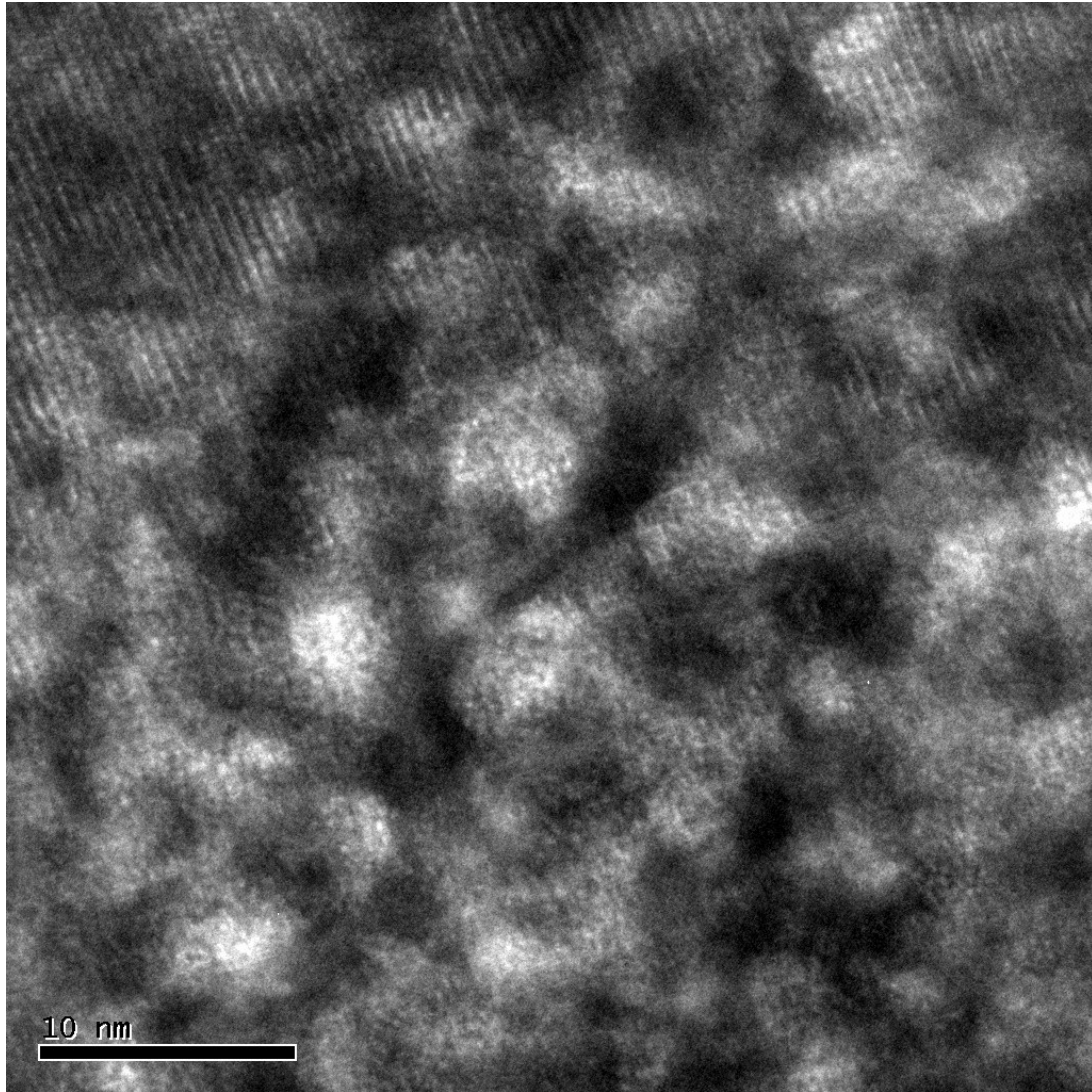

**Figure S1 | HRTEM image at the boundary of the VO<sub>2</sub>(B)/VO<sub>2</sub>(M1) interface of Fig. 3(c).** We have examined our samples by Transmission electron microscope (TEM) to confirm the sample structure at the boundary of the VO<sub>2</sub>(B)/VO<sub>2</sub>(M1) interface. The lattice image of VO<sub>2</sub>(B) is depicted at the top and the vague image of the VO<sub>2</sub>(M1) is shown at the bottom.
